# Supplementary material for: Evolution of the formation of a covalent triazine-based framework catalyzed by p-toluenesulfonic acid monohydrate
Source: Royal Society of Chemistry journal article supplement (doi:10.1039/c7ra07181g), 2017-01-01
Supplement: c7ra07181g1.pdf [file c7ra07181g1.pdf]

**Electronic Supplementary Information**

**Evolution of covalent triazine-based framework catalyzed by p-toluenesulfonic acid monohydrate**

Zheng Li,<sup>ab</sup> Yue Han,<sup>a</sup> Ying Guo,<sup>a</sup> Shuangshuang Xu,<sup>c</sup> Fenghua Chen,<sup>a</sup> Li Ye,<sup>a</sup> Zhenhuo Luo,<sup>a</sup> Xiang Liu,<sup>a</sup>  
Heng Zhou<sup>\*ab</sup> and Tong Zhao<sup>\*ab</sup>

<sup>a</sup>Laboratory of Advanced Polymer Material, Institute of Chemistry, Chinese Academy of Sciences, Beijing  
100190, China

<sup>b</sup>University of Chinese Academy of Sciences, Beijing 100049, China

<sup>c</sup>School of Material Science and Engineering, Beihang University, Beijing, , 100191, China

Email: [tzhao@iccas.ac.cn](mailto:tzhao@iccas.ac.cn), [zhouheng@iccas.ac.cn](mailto:zhouheng@iccas.ac.cn)

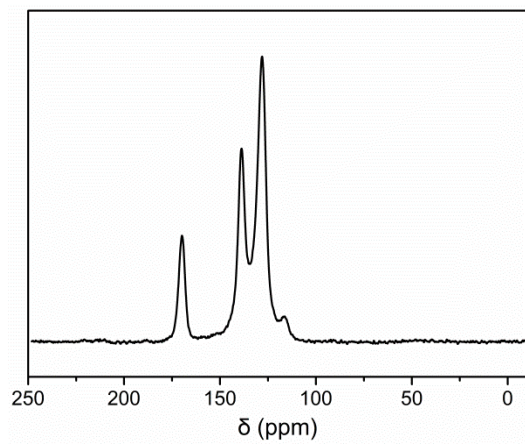

**Fig. S1**  $^{13}\text{C}$  CP-MAS solid state NMR of CTF-1@500.

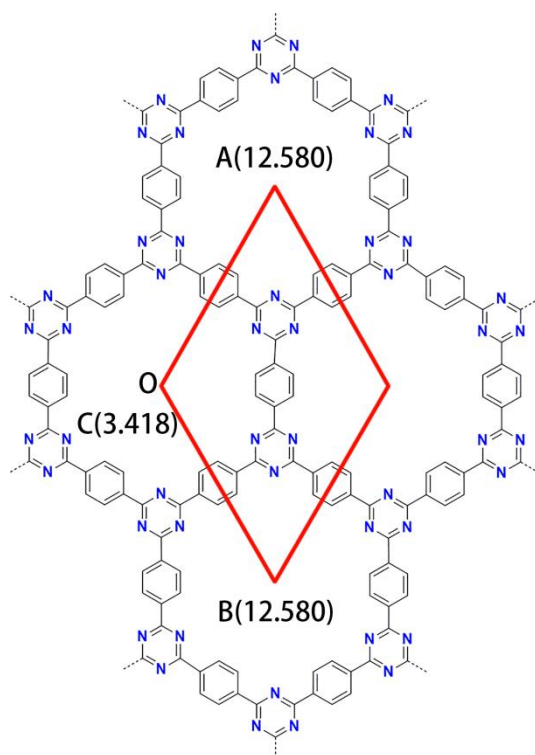

**Fig. S2** Crystal cell of CTF-1@500.

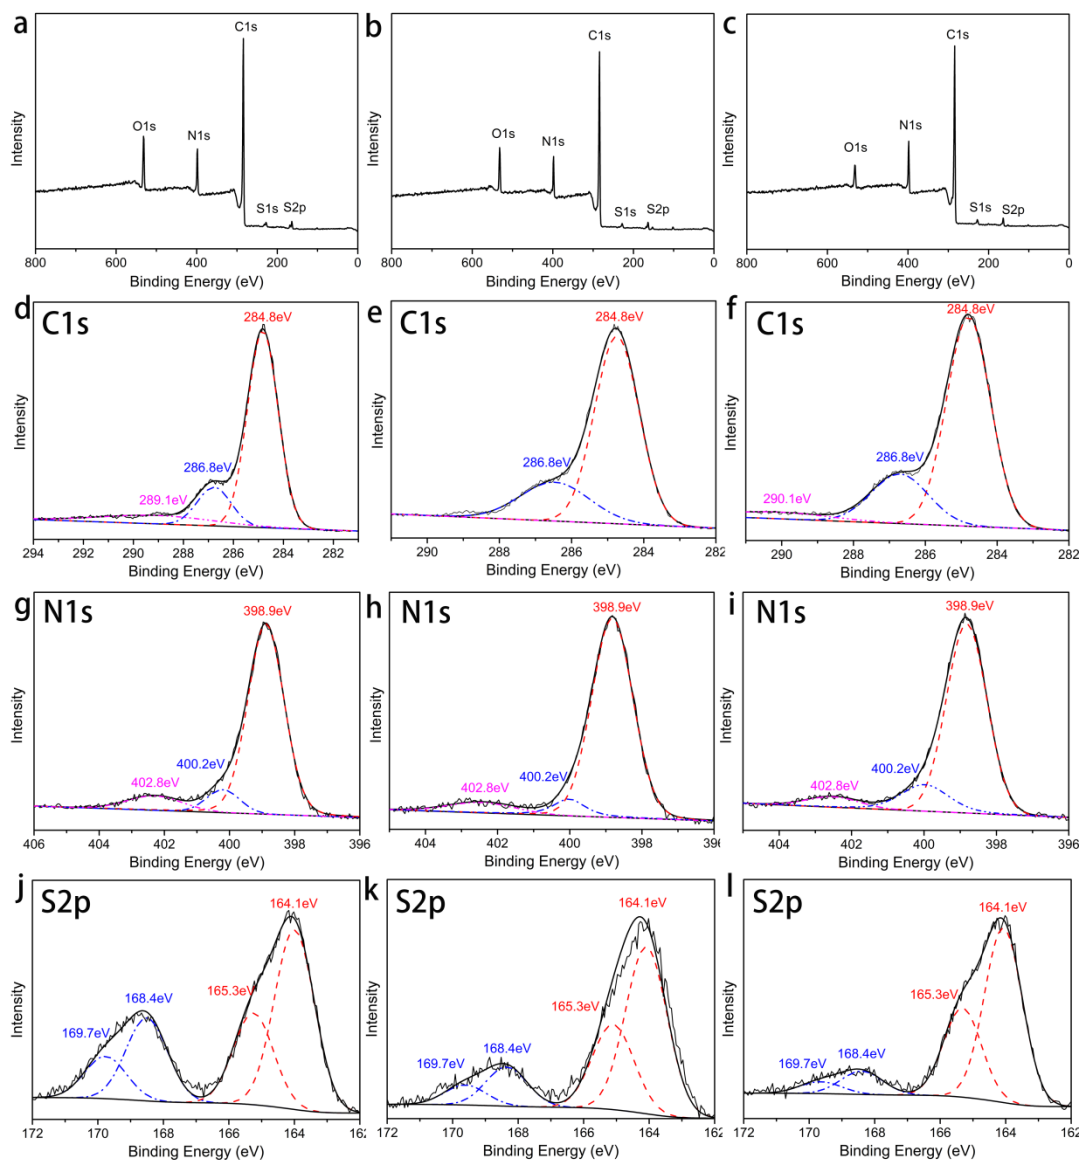

**Fig. S3** (a) XPS survey spectrum of triazine-based polymer; (b) XPS survey spectrum of CTF-1@400; (c) XPS survey spectrum of CTF-1@500; (d) Deconvoluted C1s spectrum of triazine-based polymer; (e) Deconvoluted C1s spectrum of CTF-1@400; (f) Deconvoluted C1s spectrum of CTF-1@500; (g) Deconvoluted N1s spectrum of triazine-based polymer; (h) Deconvoluted N1s spectrum of CTF-1@400; (i) Deconvoluted N1s spectrum of CTF-1@500; (j) Deconvoluted S2p spectrum of triazine-based polymer; (k) Deconvoluted S2p spectrum of CTF-1@400; (l) Deconvoluted S2p spectrum of CTF-1@500.
